# Supplementary material for: Altered DNA Methylation Profiles in SF3B1 Mutated CLL Patients
Source: MDPI journal article supplement (doi:10.3390/ijms22179337), 2021-08-28
Supplement: s1 [file s1]

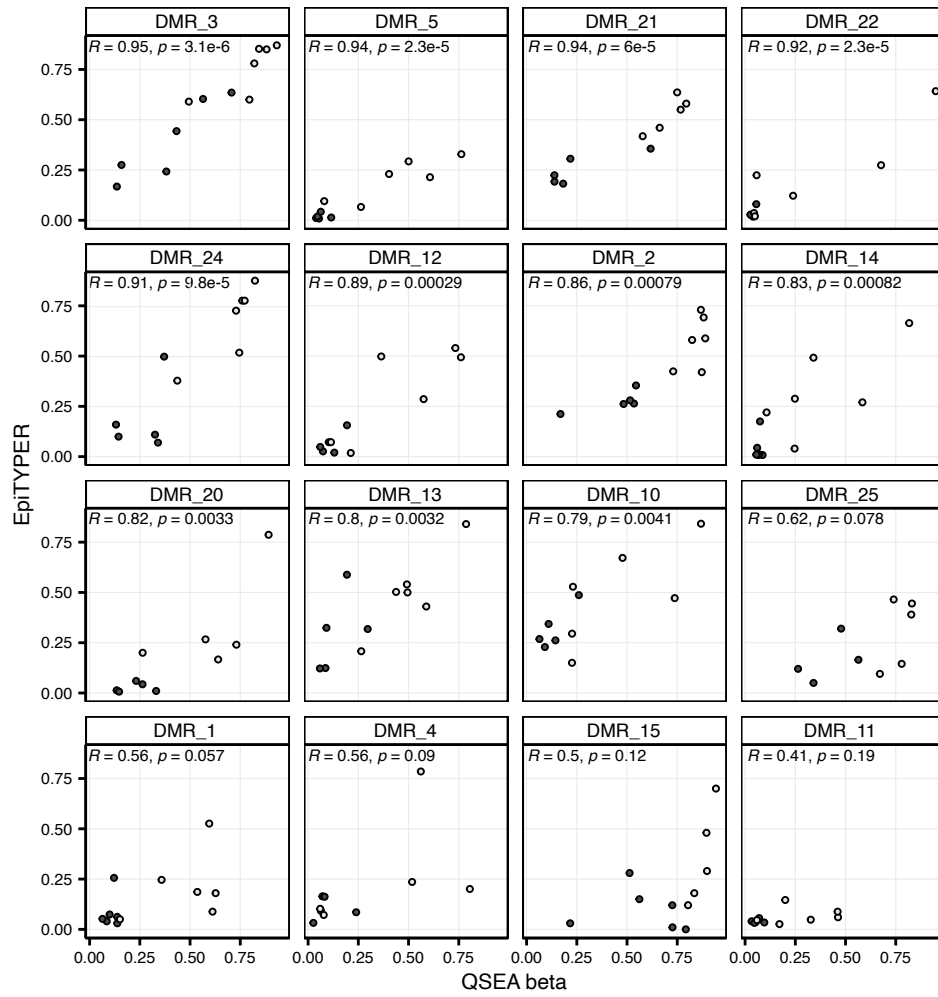

**Supplementary Figure S1. Validation between *SF3B1*<sup>WT</sup> and *SF3B1*<sup>mut</sup> CLL patients.** Correlation plots between methylation values of CpGs measured with EpiTyper and QSEA beta values for the 16 DMRs chosen for validation. DMRs were sorted by the correlation p-value.

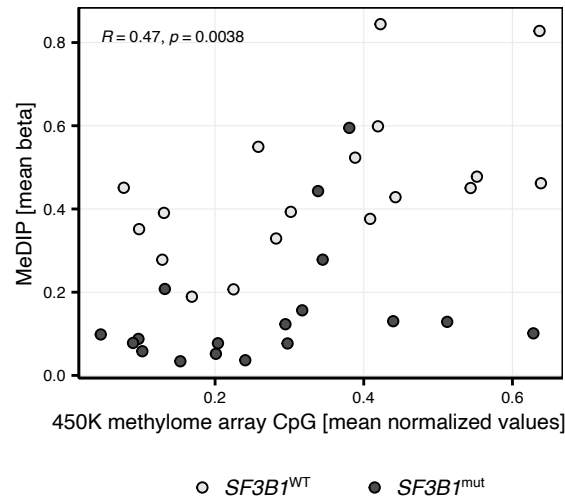

**Figure S2. Correlation between mean methylation of 18 DMRs and overlapping CpG from 450K methylome array.** Each dot represents a group (CLL *SF3B1*<sup>WT</sup> or CLL *SF3B1*<sup>mut</sup>) mean beta methylation value of a DMR detected in this study and corresponding group mean methylation of a CpG located within same region derived from CLLmethylation study and available from BloodCancerMultiOmics2017 R package [1].

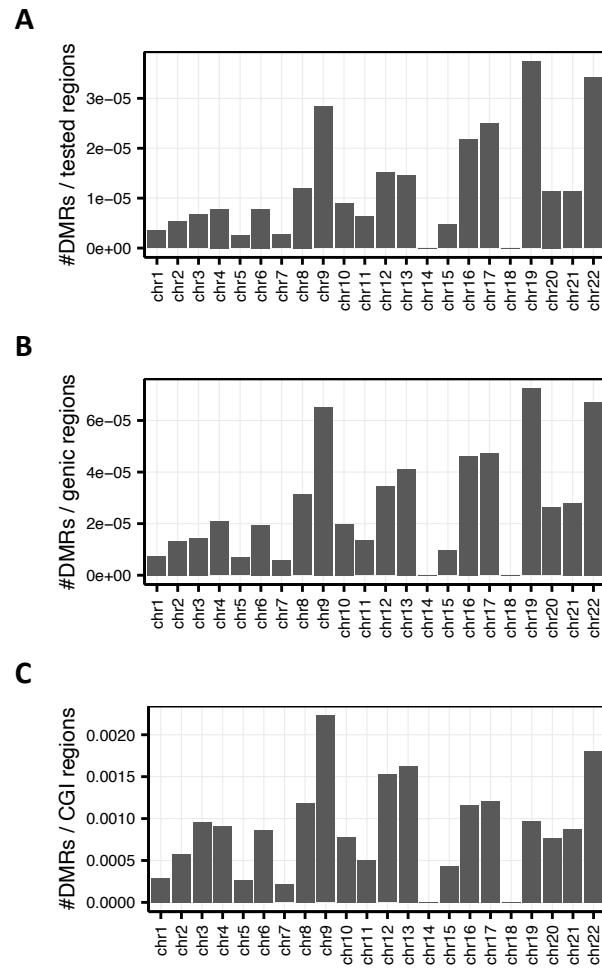

**Figure S3. Number of DMRs corrected for A) number of regions tested; B) number of genic regions tested; C) number of regions with a CpG island.** The number of differentially methylated regions per chromosome that was identified between *SF3B1*<sup>WT</sup> and *SF3B1*<sup>mut</sup> CLL patients' samples divided by the number of A) all regions tested; B) regions that overlapped a gene body; C) regions that overlapped a CpG island at each chromosome.

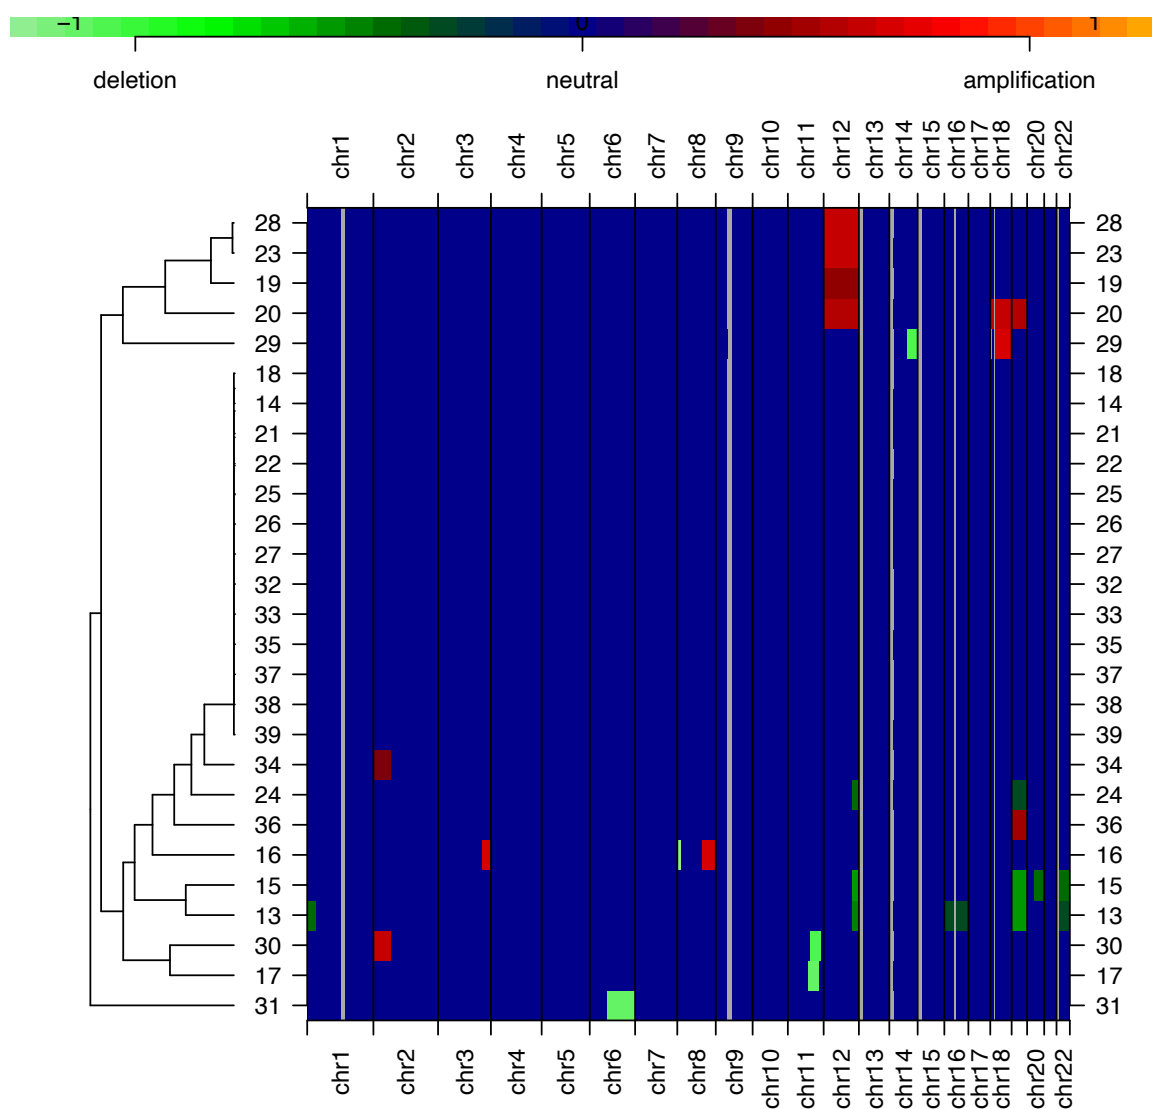

**Figure S4. Copy number variation estimated based on MeDIP-seq data.** The copy number variation per sample (rows) for each chromosome was calculated with addCNV function of QSEA R package [2] with the following options: window size = 2Mb and fragment size = 250bp. The blue color indicates single copy, whereas green indicates a deletion and red an amplification.

| ID | Source | Term ID    | Term Name                       | P <sub>adj</sub> (query_1) |
|----|--------|------------|---------------------------------|----------------------------|
| 1  | GO:MF  | GO:0005112 | Notch binding                   | $6.430 \times 10^{-3}$     |
| 2  | KEGG   | KEGG:04330 | Notch signaling pathway         | $1.487 \times 10^{-2}$     |
| 3  | WP     | WP:WP268   | Notch Signaling                 | $1.407 \times 10^{-2}$     |
| 4  | WP     | WP:WP61    | Notch Signaling Pathway Netpath | $3.369 \times 10^{-2}$     |

```

version
date
organism

```

e103\_eg50\_p15\_68c0e33  
13/05/2021, 15:21:35  
hsapiens

g:Profiler

**B.**

[illegible]

**Figure S5. Biological annotation of genes with DMRs.** The 39 unique genes that contain a DMR and were annotated were used for enrichment analysis with gProfiler. A) Graphical representation of the enrichment test results with significant terms plotted on the adjusted p-value logarithmic scale. B) Detailed table with the results of the enrichment analysis. All genes taken for the analysis are listed and the boxes are filled if a gene is annotated for the term listed in the first column.

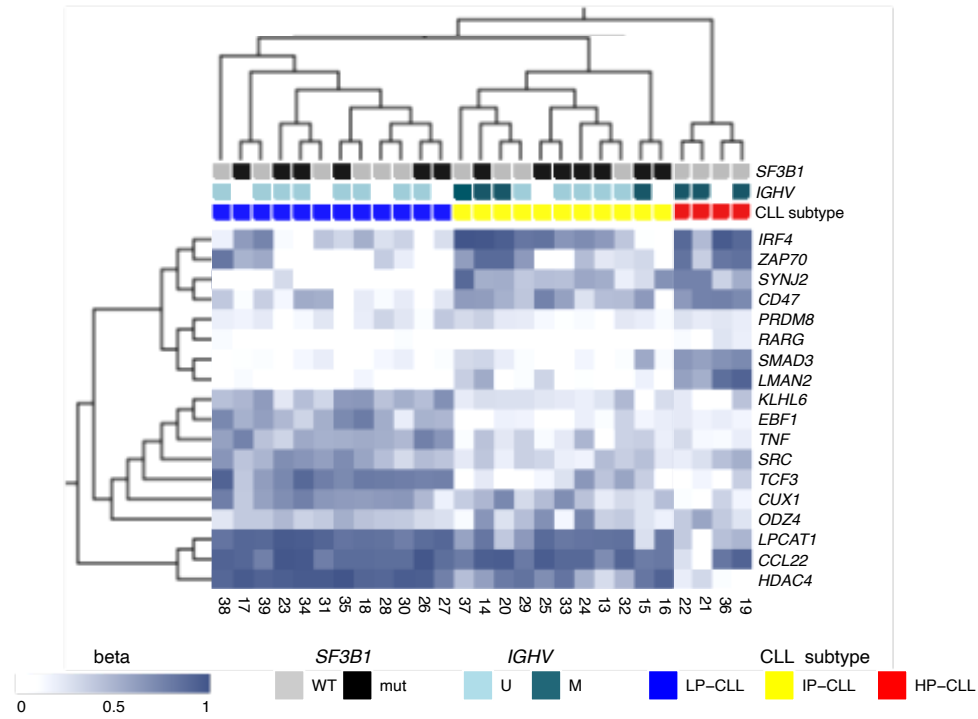

**Figure S6. *SF3B1* mutation affects B cells in at least two out of three CLL subtypes.** Heat map showing the methylation beta values for the eighteen most variable regions that were used to differentiate CLL subtypes as defined in Oakes et al. [3]. The samples were categorized based on the clusters shown in Figure 4A.

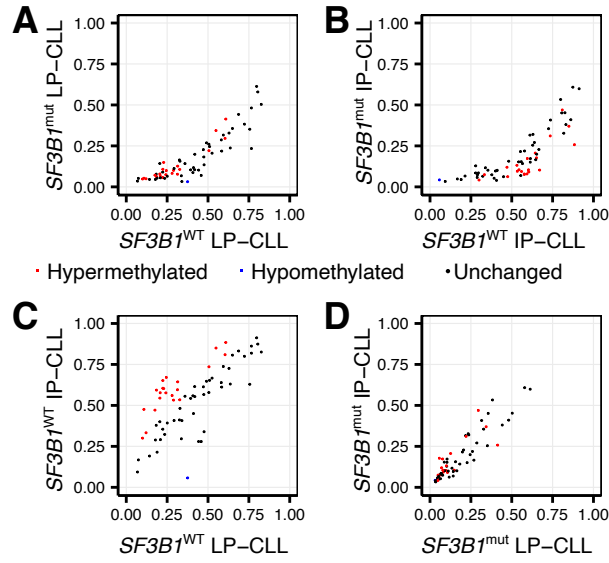

**Figure S7. DMRs during physiological B cell maturation.** For the 67 differentially methylated regions (DMRs) detected between all *SF3B1*<sup>mut</sup> and *SF3B1*<sup>WT</sup> samples we plotted their mean methylation levels (beta normalized) for LP-CLL and IP-CLL samples separately. Every dot represents a DMR. The DMRs are colored by physiological changes during LP- to IP-CLL maturation in *SF3B1*<sup>WT</sup> - with blue color indicating hypomethylated and red hypermethylated regions (≥ 20% methylation level difference). (A) Comparison between LP-CLL-*SF3B1*<sup>mut</sup> and LP-CLL-*SF3B1*<sup>WT</sup>; (B) Comparison between IP-CLL-*SF3B1*<sup>mut</sup> and IP-CLL-*SF3B1*<sup>WT</sup>; (C) Comparison between IP-CLL-*SF3B1*<sup>WT</sup> and LP-CLL-*SF3B1*<sup>WT</sup>; D) Comparison between IP-CLL-*SF3B1*<sup>mut</sup> and LP-CLL-*SF3B1*<sup>mut</sup>.

**Table S1. Information about the CLL patients used within the study.**

| MeDIP ID | MeDIP batch | Binet* disease stage | White blood cells [1/ml] | SF3B1  | IGHV | Sex    | Age at sampling [years] | SF3B1 mutation**         | TP53 mutation** | ATM mutation** | XPO1 mutation** | NOTCH1 mutation** |
|----------|-------------|----------------------|--------------------------|--------|------|--------|-------------------------|--------------------------|-----------------|----------------|-----------------|-------------------|
| 18       | 1           | C                    | 49.29                    | WT     | U    | male   | 50                      |                          |                 |                |                 |                   |
| 19       | 1           | B/C                  | 98.89                    | WT     | M    | male   | 64                      |                          |                 |                |                 | p.F1606L (5%)     |
| 20       | 1           | n.a.                 | 24.3                     | WT     | M    | male   | 48                      |                          |                 |                |                 |                   |
| 21       | 1           | n.a.                 | 24.39                    | WT     | M    | female | 57                      |                          |                 |                |                 |                   |
| 22       | 1           | A/B                  | 31.62                    | WT     | M    | male   | 60                      |                          |                 |                |                 |                   |
| 28       | 2           | A/B                  | 49.26                    | WT     | N/A  | male   | 74                      |                          |                 |                |                 |                   |
| 29       | 2           | A/B                  | 45.19                    | WT     | U    | male   | 68                      |                          |                 |                |                 |                   |
| 30       | 2           | A/B                  | 52.46                    | WT     | U    | male   | 67                      |                          |                 |                |                 |                   |
| 31       | 2           | A/B                  | 58.5                     | WT     | N/A  | male   | 47                      |                          |                 |                |                 |                   |
| 32       | 2           | n.a.                 | 78.42                    | WT     | U    | male   | 70                      |                          |                 |                |                 |                   |
| 36       | 3           | n.a.                 | 27.64                    | WT     | N/A  | male   | 65                      |                          |                 |                |                 |                   |
| 37       | 3           | A/B                  | 48.71                    | WT     | M    | male   | 57                      |                          |                 |                |                 |                   |
| 38       | 3           | A/B                  | 48.87                    | WT     | U    | female | 76                      |                          |                 |                |                 |                   |
| 39       | 3           | n.a.                 | 17.85                    | WT     | U    | male   | 64                      |                          |                 |                |                 |                   |
| 13       | 1           | A/B                  | 124.02                   | mut    | U    | male   | 52                      | H662Q (45%)              |                 |                |                 |                   |
| 14       | 1           | A/B                  | 149.42                   | mut    | M    | male   | 64                      | K700E (44%)              |                 |                |                 |                   |
| 15       | 1           | A/B                  | 34.91                    | mut    | M    | male   | 49                      | G742D (40%)              |                 |                |                 |                   |
| 16       | 1           | A/B                  | 483.77                   | mut    | N/A  | male   | 60                      | E622D (49%)              |                 |                |                 |                   |
| 17       | 1           | A/B                  | 45.81                    | mut    | N/A  | male   | 57                      | K666M (48%)              |                 |                | p.E571K (49%)   |                   |
| 23       | 2           | A/B                  | 59.92                    | mut    | U    | male   | 75                      | Q699E (51%)              |                 |                |                 | p.P2514fs (12%)   |
| 24       | 2           | C                    | 140.33                   | mut*** | U    | male   | 66                      | A284T (49%)***           |                 |                |                 |                   |
| 25       | 2           | C                    | 33.3                     | mut    | N/A  | female | 74                      | K700E (48%)              |                 |                |                 |                   |
| 26       | 2           | A/B                  | 26.69                    | mut    | U    | male   | 69                      | N626Y (48%)              |                 |                |                 |                   |
| 27       | 2           | C                    | 51.15                    | mut    | N/A  | male   | 49                      | D894G (54%); I704N (19%) |                 |                |                 |                   |
| 33       | 3           | C                    | 110.26                   | mut    | U    | male   | 72                      | Y623C (42%)              |                 |                |                 |                   |
| 34       | 3           | A/B                  | 73.62                    | mut    | U    | male   | 59                      | I704F (48%)              | p.L43**** (6%)  |                |                 |                   |
| 35       | 3           | A/B                  | 32.76                    | mut    | U    | male   | 64                      | K666E (51%)              |                 | p.C1736Y (66%) |                 |                   |

\* Binet's disease stage as defined in Binet *et al.* [4]

\*\* Mutation identified in the patient by Vollbrecht *et al.* 2015 [5]

\*\*\* The mutation was identified in the N-terminal, outside the highly conserved HEAT repeats 5–8, see Fig. 2 legend in Vollbrecht *et al.* 2015 [5]

\*\*\*\* Deletion on the second allele (see Vollbrecht *et al.* 2015 [5])



**Table S3. Primers designed for the DMR validation with EpiTYPER MassARRAY**

| Name       | Primer plus tag (small letters)                        | Anealing temperature [°C] | gene          | length of EpiTyper target | genomic coordinate of EpiTyper assay | genomic coordinate of DMR from MeDIP-seq |
|------------|--------------------------------------------------------|---------------------------|---------------|---------------------------|--------------------------------------|------------------------------------------|
| DMR_01_10F | aggaagagagGAGTAGTTGGGATTATAGGTATTTGTT                  | 56                        |               | 257                       | chr12:1602716-1602972                | chr12:1602751-1603000                    |
| DMR_01_17R | caglaaacgactcactataggagaaggtCATCAAAAAACCTCAAATTTATTC   |                           |               |                           |                                      |                                          |
| DMR_02_10F | aggaagagagGAGATTTATTTGTTTTTTGTTTAAAGGG                 | 60                        | UCKL1         | 264                       | chr20:63950750-63951013              | chr20:63950751-63951000                  |
| DMR_02_17R | caglaaacgactcactataggagaaggtACTACCCACAAAAATAATCCTACCC  |                           |               |                           |                                      |                                          |
| DMR_03_10F | aggaagagagAAGATTTTTTTAGAATTTTGGGTTA                    | 56                        | ACOX3         | 290                       | chr4:8384511-8384800                 | chr4:8384501-8384750                     |
| DMR_03_17R | caglaaacgactcactataggagaaggtTCCAAACCTTACTTTCCAAACTTA   |                           |               |                           |                                      |                                          |
| DMR_04_10F | aggaagagagGTTTTTATTTAGGGTGGGGTATTT                     | 56                        | BCL9L         | 480                       | chr11:118910355-118910834            | chr11:118910501-118910750                |
| DMR_04_17R | caglaaacgactcactataggagaaggtAATCTCTAAACCTCTACTACAACACC |                           |               |                           |                                      |                                          |
| DMR_05_10F | aggaagagagGTGGGGTTGTTGTAGGGTATTTT                      | 56                        | ZFPM1         | 374                       | chr16:88478366-88478739              | chr16:88478501-88478750                  |
| DMR_05_17R | caglaaacgactcactataggagaaggtTAATTAACCTCCTCATCCCTCTAA   |                           |               |                           |                                      |                                          |
| DMR_10_10F | aggaagagagTGTTAGTTTGTGTTAGGTAGGGG                      | 56                        | SEPTIN9       | 422                       | chr17:77435444-77435865              | chr17:77435501-77435750                  |
| DMR_10_17R | caglaaacgactcactataggagaaggtAACTCAAAAAACCACTCCAAAT     |                           |               |                           |                                      |                                          |
| DMR_11_10F | aggaagagagGATTTTGTAAATTGTTTGGTGT                       | 60                        | HTRA3         | 290                       | chr4:8270104-8270393                 | chr4:8270001-8270250                     |
| DMR_11_17R | caglaaacgactcactataggagaaggtAAAAAAACCTTCACTTCCCTCTAA   |                           |               |                           |                                      |                                          |
| DMR_12_10F | aggaagagagTGTTTATTTAAGTTGGTGTAGGGGA                    | 56                        | SGCG          | 391                       | chr13:23324392-23324782              | chr13:23324501-23324750                  |
| DMR_12_17R | caglaaacgactcactataggagaaggtTCCAATAAAAAACACATTACTTTTCC |                           |               |                           |                                      |                                          |
| DMR_13_10F | aggaagagagAGAGTTGGGGGTTTTATTAGTTTTTTT                  | 56                        | SCAMP4; ADAT3 | 465                       | chr19:1909389-1909853                | chr19:1909501-1909750                    |
| DMR_13_17R | caglaaacgactcactataggagaaggtTCCCTTAACACATTCCTACAACATA  |                           |               |                           |                                      |                                          |
| DMR_14_10F | aggaagagagAAGAGTGGAGGTTAGGAGAGTTGT                     | 56                        | RHOBTB2       | 344                       | chr8:23003905-23004248               | chr8:23004001-23004250                   |
| DMR_14_17R | caglaaacgactcactataggagaaggtCAAAACCCATTCAAATAAAAAA     |                           |               |                           |                                      |                                          |
| DMR_15_10F | aggaagagagTATGTGTTAGTGTGTAAGATTGTGTAA                  | 60                        | CELSR1        | 218                       | chr22:46420444-46420661              | chr22:46420251-46420500                  |
| DMR_15_17R | caglaaacgactcactataggagaaggtACATACTACCCAAATACACTCACC   |                           |               |                           |                                      |                                          |
| DMR_20_10F | aggaagagagGTTTTGTTGTTTGGTTGGAGTGTAG                    | 60                        | TK2           | 413                       | chr16:66526917-66527329              | chr16:66527001-66527250                  |
| DMR_20_17R | caglaaacgactcactataggagaaggtCAAAATAAAACCTTACCCCAAT     |                           |               |                           |                                      |                                          |
| DMR_21_10F | aggaagagagAGTATTTTGTGGGTATTATGGTT                      | 56                        | HPCAL1        | 433                       | chr2:10325839-10326271               | chr2:10326001-10326250                   |
| DMR_21_17R | caglaaacgactcactataggagaaggtAAAAACAAAAAATCTCCCATCTACC  |                           |               |                           |                                      |                                          |
| DMR_22_10F | aggaagagagTTTTAGGAGGATAGGGTAGGGTTA                     | 56                        | IL17C         | 198                       | chr16:88639754-88639951              | chr16:88639751-88640000                  |
| DMR_22_17R | caglaaacgactcactataggagaaggtACAAAAACCCCAATATAAAAAACC   |                           |               |                           |                                      |                                          |
| DMR_24_10F | aggaagagagTTAGTTTTGTGTTTATTGAGGGAGG                    | 56                        | BLK           | 474                       | chr8:11517930-11518403               | chr8:11518001-11518250                   |
| DMR_24_17R | caglaaacgactcactataggagaaggtTTCAAAATCAAACCCCAATATCTAAC |                           |               |                           |                                      |                                          |
| DMR_25_10F | aggaagagagGTGTGGGATTTTAGGTTAGGGTTTA                    | 60                        | BIN3          | 353                       | chr8:22627450-22627802               | chr8:22627501-22627750                   |
| DMR_25_17R | caglaaacgactcactataggagaaggtCTATCTAACCTACCCCACTTAACC   |                           |               |                           |                                      |                                          |

**Table S4. EpiTyper methylation values compared to MeDIP-seq beta values.** Methylation values are given for individual samples. Shown are the MeDIP-seq beta values and the mean EpiTyper methylation values for a given amplicon. In addition, the methylation values for the individual CpG units within an amplicon, that passed the quality criteria are shown. Excluded were CpG units with more than 2 CpGs, a bad standard curve, with less than 50% of the samples having methylation values, CpG units with at least two peaks underlying the unmethylated CpG unit and CpG units with identical masses. Cells are colored by the methylation values for individual CpGs.

| DMR   | sample | SF3B1 | MeDIP<br>beta | EpiTyper<br>mean | CpG position in amplicon |      |      |      |      |
|-------|--------|-------|---------------|------------------|--------------------------|------|------|------|------|
|       |        |       |               |                  | 42                       | 94   | 132  | 177  | 212  |
| DMR_1 | 19     | WT    | 0.60          | 0.53             | 0.63                     | 0.11 | 0.31 | 0.79 | 0.79 |
| DMR_1 | 21     | WT    | 0.36          | 0.25             | 0.31                     | 0.06 | 0.03 | 0.74 | 0.09 |
| DMR_1 | 28     | WT    | 0.54          | 0.19             | 0.04                     | 0.05 | 0.00 | 0.42 | 0.42 |
| DMR_1 | 30     | WT    | 0.15          | 0.05             | 0.07                     | 0.07 | 0.06 | 0.04 | 0.01 |
| DMR_1 | 31     | WT    | 0.61          | 0.09             | 0.06                     | 0.05 | 0.00 | 0.16 | 0.17 |
| DMR_1 | 36     | WT    | 0.63          | 0.18             | 0.42                     | 0.07 | 0.04 | 0.28 | 0.09 |
| DMR_1 | 14     | Mut   | 0.12          | 0.26             | 0.48                     | 0.04 | 0.05 | 0.44 | 0.27 |
| DMR_1 | 17     | Mut   | 0.10          | 0.07             | 0.03                     | 0.06 | 0.02 | 0.02 | 0.24 |
| DMR_1 | 24     | Mut   | 0.14          | 0.03             | 0.02                     | 0.07 | 0.00 | 0.00 | 0.06 |
| DMR_1 | 25     | Mut   | 0.09          | 0.04             | 0.03                     | 0.05 | 0.02 | 0.04 | 0.06 |
| DMR_1 | 26     | Mut   | 0.14          | 0.06             | 0.04                     | 0.05 | 0.03 | 0.03 | 0.16 |
| DMR_1 | 33     | Mut   | 0.06          | 0.05             | 0.06                     | 0.05 | 0.03 | 0.06 | 0.06 |

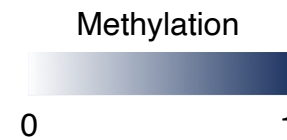

| DMR   | sample | SF3B1 | MeDIP<br>beta | EpiTyper<br>mean | CpG position in amplicon |      |      |      |      |
|-------|--------|-------|---------------|------------------|--------------------------|------|------|------|------|
|       |        |       |               |                  | 41                       | 99   | 143  | 167  | 225  |
| DMR_2 | 19     | WT    | 0.87          | 0.42             | 0.91                     | 0.36 | 0.26 | 0.32 | 0.25 |
| DMR_2 | 21     | WT    | 0.73          | 0.42             | 0.56                     | 0.60 | 0.17 | 0.41 | 0.38 |
| DMR_2 | 28     | WT    | 0.87          | 0.73             | 0.83                     | 0.64 | 0.69 | 0.78 | 0.71 |
| DMR_2 | 30     | WT    | 0.82          | 0.58             | 0.89                     | 0.56 | 0.40 | 0.54 | 0.51 |
| DMR_2 | 31     | WT    | 0.89          | 0.59             | 0.46                     | 0.64 | 0.42 | 0.65 | 0.77 |
| DMR_2 | 36     | WT    | 0.88          | 0.69             | 0.86                     | 0.68 | 0.55 | 0.63 | 0.74 |
| DMR_2 | 14     | Mut   | 0.54          | 0.35             | 0.77                     | 0.33 | 0.16 | 0.14 | 0.37 |
| DMR_2 | 17     | Mut   | 0.17          | 0.21             | 1.00                     | 0.00 | 0.00 | 0.06 | 0.00 |
| DMR_2 | 24     | Mut   | 0.48          | 0.26             | 0.83                     | 0.38 | 0.04 | 0.03 | 0.03 |
| DMR_2 | 25     | Mut   | 0.52          | NA               | NA                       | NA   | NA   | NA   | NA   |
| DMR_2 | 26     | Mut   | 0.53          | 0.26             | 0.72                     | 0.04 | 0.04 | 0.11 | 0.41 |
| DMR_2 | 33     | Mut   | 0.52          | 0.28             | 0.73                     | 0.26 | 0.10 | 0.09 | 0.22 |

| DMR   | sample | SF3B1 | MeDIP<br>beta | EpiTyper<br>mean | CpG position in amplicon |      |      |      |
|-------|--------|-------|---------------|------------------|--------------------------|------|------|------|
|       |        |       |               |                  | 74                       | 90   | 171  | 235  |
| DMR_3 | 19     | WT    | 0.93          | 0.87             | NA                       | 0.92 | 0.78 | 0.91 |
| DMR_3 | 21     | WT    | 0.84          | 0.85             | 0.73                     | 0.91 | 0.83 | 0.94 |
| DMR_3 | 28     | WT    | 0.82          | 0.78             | 0.58                     | 0.79 | 0.82 | 0.93 |
| DMR_3 | 30     | WT    | 0.80          | 0.60             | 0.32                     | 0.67 | 0.60 | 0.81 |
| DMR_3 | 31     | WT    | 0.49          | 0.59             | NA                       | 0.41 | 0.54 | 0.82 |
| DMR_3 | 36     | WT    | 0.88          | 0.85             | 0.72                     | 0.89 | 0.85 | 0.94 |
| DMR_3 | 14     | Mut   | 0.71          | 0.64             | 0.39                     | 0.67 | 0.63 | 0.85 |
| DMR_3 | 17     | Mut   | 0.16          | 0.28             | 0.23                     | 0.25 | 0.33 | 0.29 |
| DMR_3 | 24     | Mut   | 0.56          | 0.60             | NA                       | 0.21 | 0.73 | 0.87 |
| DMR_3 | 25     | Mut   | 0.14          | 0.17             | 0.00                     | 0.15 | 0.22 | 0.30 |
| DMR_3 | 26     | Mut   | 0.38          | 0.24             | 0.14                     | 0.12 | 0.31 | 0.40 |
| DMR_3 | 33     | Mut   | 0.43          | 0.44             | NA                       | 0.36 | 0.46 | 0.51 |

| DMR   | sample | SF3B1 | MeDIP<br>beta | EpiTyper<br>mean | CpG position in amplicon |      |      |         |         |      |         |         |      |      |      |      |
|-------|--------|-------|---------------|------------------|--------------------------|------|------|---------|---------|------|---------|---------|------|------|------|------|
|       |        |       |               |                  | 38                       | 78   | 125  | 145:149 | 211:219 | 231  | 282:291 | 301:305 | 370  | 416  | 455  | 462  |
| DMR_4 | 19     | WT    | 0.73          | NA               | NA                       | NA   | NA   | NA      | NA      | NA   | NA      | NA      | NA   | NA   | NA   | NA   |
| DMR_4 | 21     | WT    | 0.56          | 0.77             | 0.57                     | 0.85 | 1.00 | 0.92    | 0.81    | 0.76 | 0.70    | 0.66    | 0.93 | 0.82 | 0.79 | 0.43 |
| DMR_4 | 28     | WT    | 0.08          | 0.05             | 0.03                     | 0.02 | 0.07 | 0.02    | 0.00    | 0.18 | 0.07    | 0.02    | 0.06 | 0.08 | 0.04 | 0.05 |
| DMR_4 | 30     | WT    | 0.52          | 0.12             | 0.00                     | 0.06 | 0.00 | 0.10    | 0.01    | 0.12 | 0.05    | 0.01    | 0.44 | 0.55 | 0.03 | 0.07 |
| DMR_4 | 31     | WT    | 0.06          | 0.07             | 0.03                     | 0.03 | 0.00 | 0.04    | 0.00    | 0.09 | 0.07    | 0.01    | 0.04 | 0.47 | 0.00 | 0.03 |
| DMR_4 | 36     | WT    | 0.81          | 0.19             | 0.16                     | 0.05 | 0.07 | 0.37    | 0.02    | 0.20 | 0.14    | 0.12    | 0.35 | 0.56 | 0.00 | 0.29 |
| DMR_4 | 14     | Mut   | 0.24          | 0.09             | 0.04                     | 0.04 | 0.29 | 0.28    | 0.02    | 0.12 | 0.10    | 0.05    | 0.06 | 0.02 | 0.00 | 0.02 |
| DMR_4 | 17     | Mut   | 0.07          | 0.12             | 0.34                     | 0.05 | 0.00 | 0.02    | 0.02    | 0.18 | 0.07    | 0.08    | 0.36 | 0.31 | 0.00 | 0.03 |
| DMR_4 | 24     | Mut   | 0.06          | 0.07             | 0.02                     | 0.06 | 0.00 | 0.01    | 0.02    | 0.26 | 0.07    | 0.03    | 0.04 | 0.26 | 0.00 | 0.03 |
| DMR_4 | 25     | Mut   | 0.06          | NA               | NA                       | NA   | NA   | NA      | NA      | NA   | NA      | NA      | NA   | NA   | NA   | NA   |
| DMR_4 | 26     | Mut   | 0.08          | 0.15             | 0.12                     | 0.18 | 0.02 | 0.54    | 0.00    | 0.20 | 0.12    | 0.03    | 0.13 | 0.43 | 0.00 | 0.05 |
| DMR_4 | 33     | Mut   | 0.03          | 0.02             | 0.07                     | 0.04 | 0.00 | 0.03    | 0.01    | 0.00 | 0.03    | 0.00    | 0.00 | 0.04 | 0.00 | 0.02 |

| DMR   | sample | SF3B1 | MeDIP<br>beta | EpiTYPER<br>mean | CpG position in amplicon |       |      |      |      |      |      |      |
|-------|--------|-------|---------------|------------------|--------------------------|-------|------|------|------|------|------|------|
|       |        |       |               |                  | 59                       | 90:96 | 140  | 159  | 212  | 251  | 287  | 358  |
| DMR_5 | 19     | WT    | 0.76          | 0.33             | 0.32                     | 0.37  | 0.34 | 0.42 | 0.40 | 0.05 | 0.32 | 0.41 |
| DMR_5 | 21     | WT    | 0.26          | 0.07             | 0.01                     | 0.02  | 0.03 | 0.03 | 0.04 | 0.12 | 0.11 | 0.17 |
| DMR_5 | 28     | WT    | 0.50          | 0.29             | NA                       | 0.14  | 0.26 | 0.25 | 0.26 | 0.44 | 0.33 | 0.37 |
| DMR_5 | 30     | WT    | 0.40          | 0.23             | 0.25                     | 0.04  | 0.24 | 0.24 | 0.24 | 0.32 | 0.24 | 0.27 |
| DMR_5 | 31     | WT    | 0.61          | 0.21             | NA                       | 0.07  | 0.26 | 0.18 | 0.26 | 0.25 | 0.18 | 0.30 |
| DMR_5 | 36     | WT    | 0.08          | 0.10             | 0.00                     | 0.10  | 0.06 | 0.06 | 0.04 | 0.24 | 0.12 | 0.14 |
| DMR_5 | 14     | Mut   | 0.04          | 0.01             | 0.02                     | 0.01  | 0.03 | 0.00 | 0.03 | 0.00 | 0.00 | 0.00 |
| DMR_5 | 17     | Mut   | 0.05          | 0.01             | 0.00                     | 0.00  | 0.03 | 0.01 | 0.03 | 0.00 | 0.00 | 0.00 |
| DMR_5 | 24     | Mut   | 0.05          | 0.02             | 0.08                     | 0.00  | 0.01 | 0.02 | 0.04 | 0.00 | 0.00 | 0.00 |
| DMR_5 | 25     | Mut   | 0.05          | NA               | NA                       | NA    | NA   | NA   | NA   | NA   | NA   | NA   |
| DMR_5 | 26     | Mut   | 0.12          | 0.01             | 0.00                     | 0.00  | 0.02 | 0.00 | 0.03 | 0.00 | 0.00 | 0.06 |
| DMR_5 | 33     | Mut   | 0.06          | 0.04             | 0.00                     | 0.01  | 0.04 | 0.01 | 0.04 | 0.22 | 0.00 | 0.02 |

| DMR    | sample | SF3B1 | MeDIP<br>beta | EpiTYPER<br>mean | CpG position in amplicon |      |      |      |         |      |
|--------|--------|-------|---------------|------------------|--------------------------|------|------|------|---------|------|
|        |        |       |               |                  | 81                       | 228  | 247  | 347  | 394:397 | 404  |
| DMR_10 | 19     | WT    | 0.87          | 0.84             | 0.74                     | 0.83 | 0.96 | 0.82 | 0.81    | 0.89 |
| DMR_10 | 21     | WT    | 0.48          | 0.67             | 0.06                     | 0.67 | 0.58 | 0.89 | 0.83    | 1.00 |
| DMR_10 | 28     | WT    | 0.23          | 0.53             | 0.05                     | 0.35 | 0.23 | 0.64 | 0.90    | 1.00 |
| DMR_10 | 30     | WT    | 0.23          | 0.15             | 0.03                     | 0.01 | 0.03 | 0.07 | 0.45    | 0.31 |
| DMR_10 | 31     | WT    | 0.23          | 0.30             | 0.03                     | 0.04 | 0.04 | 0.25 | 0.69    | 0.72 |
| DMR_10 | 36     | WT    | 0.74          | 0.47             | 0.04                     | 0.24 | 0.23 | 0.77 | 0.77    | 0.78 |
| DMR_10 | 14     | Mut   | 0.26          | 0.49             | 0.02                     | 0.21 | 0.19 | 0.73 | 0.92    | 0.85 |
| DMR_10 | 17     | Mut   | 0.14          | 0.26             | 0.03                     | 0.00 | 0.05 | 0.20 | 0.65    | 0.64 |
| DMR_10 | 24     | Mut   | 0.06          | 0.27             | 0.04                     | 0.00 | 0.03 | 0.11 | 0.71    | 0.72 |
| DMR_10 | 25     | Mut   | 0.12          | NA               | NA                       | NA   | NA   | NA   | NA      | NA   |
| DMR_10 | 26     | Mut   | 0.11          | 0.34             | 0.06                     | 0.00 | 0.02 | 0.12 | 0.86    | 1.00 |
| DMR_10 | 33     | Mut   | 0.09          | 0.23             | 0.04                     | 0.00 | 0.03 | 0.02 | 0.66    | 0.62 |

| DMR    | sample | SF3B1 | MeDIP<br>beta | EpiTYPER<br>mean | CpG position in amplicon |         |      |         |         |
|--------|--------|-------|---------------|------------------|--------------------------|---------|------|---------|---------|
|        |        |       |               |                  | 64                       | 136:139 | 217  | 247:255 | 266:270 |
| DMR_11 | 19     | WT    | 0.46          | 0.06             | 0.05                     | 0.06    | 0.08 | 0.02    | 0.09    |
| DMR_11 | 21     | WT    | 0.46          | 0.09             | 0.08                     | 0.10    | 0.10 | 0.03    | 0.13    |
| DMR_11 | 28     | WT    | 0.20          | 0.15             | 0.05                     | 0.07    | 0.43 | 0.06    | 0.12    |
| DMR_11 | 30     | WT    | 0.17          | 0.03             | 0.03                     | 0.02    | 0.00 | 0.03    | 0.05    |
| DMR_11 | 31     | WT    | 0.06          | 0.05             | 0.03                     | 0.03    | 0.03 | 0.03    | 0.11    |
| DMR_11 | 36     | WT    | 0.33          | 0.05             | 0.04                     | 0.03    | 0.04 | 0.03    | 0.10    |
| DMR_11 | 14     | Mut   | 0.05          | 0.04             | 0.03                     | 0.03    | 0.05 | 0.02    | 0.07    |
| DMR_11 | 17     | Mut   | 0.07          | 0.06             | 0.05                     | 0.03    | 0.01 | 0.02    | 0.17    |
| DMR_11 | 24     | Mut   | 0.10          | 0.03             | 0.03                     | 0.04    | 0.00 | 0.02    | 0.08    |
| DMR_11 | 25     | Mut   | 0.03          | 0.04             | 0.05                     | 0.04    | 0.01 | 0.01    | 0.09    |
| DMR_11 | 26     | Mut   | 0.05          | 0.04             | 0.04                     | 0.03    | 0.00 | 0.02    | 0.09    |
| DMR_11 | 33     | Mut   | 0.05          | 0.03             | 0.03                     | 0.02    | 0.00 | 0.02    | 0.09    |

| DMR    | sample | SF3B1 | MeDIP<br>beta | EpiTYPER<br>mean | CpG position in amplicon |      |         |      |      |
|--------|--------|-------|---------------|------------------|--------------------------|------|---------|------|------|
|        |        |       |               |                  | 36                       | 115  | 169:177 | 195  | 268  |
| DMR_12 | 19     | WT    | 0.73          | 0.54             | 0.68                     | 0.49 | 0.59    | 0.52 | 0.42 |
| DMR_12 | 21     | WT    | 0.36          | 0.50             | 0.06                     | 0.67 | 0.78    | 0.87 | 0.11 |
| DMR_12 | 28     | WT    | 0.58          | 0.29             | 0.30                     | 0.09 | 0.37    | 0.55 | 0.12 |
| DMR_12 | 30     | WT    | 0.11          | 0.07             | 0.06                     | 0.07 | 0.11    | 0.12 | 0.00 |
| DMR_12 | 31     | WT    | 0.21          | 0.02             | 0.01                     | 0.04 | 0.04    | 0.00 | 0.00 |
| DMR_12 | 36     | WT    | 0.76          | 0.49             | 0.40                     | 0.41 | 0.57    | 0.71 | 0.38 |
| DMR_12 | 14     | Mut   | 0.19          | 0.16             | 0.09                     | 0.15 | 0.18    | 0.28 | 0.08 |
| DMR_12 | 17     | Mut   | 0.07          | 0.03             | 0.04                     | 0.03 | 0.05    | 0.01 | 0.00 |
| DMR_12 | 24     | Mut   | 0.06          | 0.05             | 0.02                     | 0.08 | 0.06    | 0.08 | 0.00 |
| DMR_12 | 25     | Mut   | 0.06          | NA               | NA                       | NA   | NA      | NA   | NA   |
| DMR_12 | 26     | Mut   | 0.10          | 0.07             | 0.02                     | 0.03 | 0.04    | 0.00 | 0.27 |
| DMR_12 | 33     | Mut   | 0.13          | 0.02             | 0.03                     | 0.03 | 0.04    | 0.00 | 0.00 |

| DMR    | sample | SF3B1 | MeDIP<br>beta | EpiTYPER<br>mean | CpG position in amplicon |      |      |      |      |
|--------|--------|-------|---------------|------------------|--------------------------|------|------|------|------|
|        |        |       |               |                  | 162                      | 291  | 308  | 336  | 358  |
| DMR_13 | 19     | WT    | 0.79          | 0.84             | 0.92                     | 0.99 | 0.90 | 0.45 | 0.94 |
| DMR_13 | 21     | WT    | 0.44          | 0.50             | 0.60                     | 0.28 | 0.27 | NA   | 0.86 |
| DMR_13 | 28     | WT    | 0.26          | 0.21             | 0.21                     | 0.27 | 0.26 | NA   | 0.09 |
| DMR_13 | 30     | WT    | 0.49          | 0.54             | 0.43                     | 0.79 | 0.83 | 0.52 | 0.13 |
| DMR_13 | 31     | WT    | 0.49          | 0.50             | 0.67                     | 0.45 | 0.38 | 0.45 | 0.55 |
| DMR_13 | 36     | WT    | 0.59          | 0.43             | 0.48                     | 0.54 | 0.47 | 0.00 | 0.66 |
| DMR_13 | 14     | Mut   | 0.30          | 0.32             | 0.39                     | 0.26 | 0.09 | 0.00 | 0.85 |
| DMR_13 | 17     | Mut   | 0.09          | 0.32             | 0.31                     | 0.13 | 0.36 | 0.00 | 0.82 |
| DMR_13 | 24     | Mut   | 0.09          | 0.12             | 0.06                     | 0.04 | 0.13 | 0.04 | 0.35 |
| DMR_13 | 25     | Mut   | 0.08          | NA               | NA                       | NA   | NA   | NA   | NA   |
| DMR_13 | 26     | Mut   | 0.19          | 0.59             | 0.11                     | 0.38 | 0.62 | 1.00 | 0.83 |
| DMR_13 | 33     | Mut   | 0.06          | 0.12             | 0.18                     | 0.03 | 0.00 | 0.00 | 0.40 |

| DMR    | sample | SF3B1 | MeDIP<br>beta | EpiTYPER<br>mean | CpG position in amplicon |      |      |         |      |
|--------|--------|-------|---------------|------------------|--------------------------|------|------|---------|------|
|        |        |       |               |                  | 106:112                  | 160  | 225  | 247:249 | 286  |
| DMR_14 | 19     | WT    | 0.11          | 0.22             | 0.00                     | 0.01 | 0.25 | 0.37    | 0.47 |
| DMR_14 | 21     | WT    | 0.82          | 0.66             | 0.13                     | 0.40 | 0.89 | 0.90    | 1.00 |
| DMR_14 | 28     | WT    | 0.34          | 0.49             | 0.02                     | 0.18 | 0.55 | 0.71    | 1.00 |
| DMR_14 | 30     | WT    | 0.25          | 0.04             | 0.00                     | 0.01 | 0.03 | 0.07    | 0.09 |
| DMR_14 | 31     | WT    | 0.25          | 0.29             | 0.00                     | 0.01 | 0.40 | 0.51    | 0.52 |
| DMR_14 | 36     | WT    | 0.58          | 0.27             | 0.02                     | 0.02 | 0.23 | 0.44    | 0.64 |
| DMR_14 | 14     | Mut   | 0.06          | 0.04             | 0.00                     | 0.01 | 0.09 | 0.03    | 0.09 |
| DMR_14 | 17     | Mut   | 0.09          | 0.01             | 0.00                     | 0.01 | 0.00 | 0.02    | 0.01 |
| DMR_14 | 24     | Mut   | 0.07          | 0.01             | 0.00                     | 0.02 | 0.03 | 0.01    | 0.00 |
| DMR_14 | 25     | Mut   | 0.07          | 0.18             | 0.52                     | 0.00 | 0.18 | 0.00    | NA   |
| DMR_14 | 26     | Mut   | 0.07          | 0.01             | 0.00                     | 0.02 | 0.00 | 0.02    | 0.00 |
| DMR_14 | 33     | Mut   | 0.06          | 0.01             | 0.00                     | 0.01 | 0.02 | 0.02    | 0.00 |

| DMR    | sample | SF3B1 | MeDIP<br>beta | EpiTYPER<br>mean | CpG position in amplicon |  |  |  |  |
|--------|--------|-------|---------------|------------------|--------------------------|--|--|--|--|
|        |        |       |               |                  | 172                      |  |  |  |  |
| DMR_15 | 19     | WT    | 0.94          | 0.70             | 0.70                     |  |  |  |  |
| DMR_15 | 21     | WT    | 0.90          | 0.48             | 0.48                     |  |  |  |  |
| DMR_15 | 28     | WT    | 0.80          | 0.12             | 0.12                     |  |  |  |  |
| DMR_15 | 30     | WT    | 0.83          | 0.18             | 0.18                     |  |  |  |  |
| DMR_15 | 31     | WT    | 0.90          | NA               | NA                       |  |  |  |  |
| DMR_15 | 36     | WT    | 0.90          | 0.29             | 0.29                     |  |  |  |  |
| DMR_15 | 14     | Mut   | 0.73          | 0.12             | 0.12                     |  |  |  |  |
| DMR_15 | 17     | Mut   | 0.73          | 0.01             | 0.01                     |  |  |  |  |
| DMR_15 | 24     | Mut   | 0.22          | 0.03             | 0.03                     |  |  |  |  |
| DMR_15 | 25     | Mut   | 0.79          | 0.00             | 0.00                     |  |  |  |  |
| DMR_15 | 26     | Mut   | 0.51          | 0.28             | 0.28                     |  |  |  |  |
| DMR_15 | 33     | Mut   | 0.56          | 0.15             | 0.15                     |  |  |  |  |

| DMR    | sample | SF3B1 | MeDIP<br>beta | EpiTYPER<br>mean | CpG position in amplicon |       |      |
|--------|--------|-------|---------------|------------------|--------------------------|-------|------|
|        |        |       |               |                  | 48                       | 65:70 | 257  |
| DMR_20 | 19     | WT    | 0.89          | 0.79             | 0.80                     | 0.80  | 0.76 |
| DMR_20 | 21     | WT    | 0.64          | 0.17             | 0.19                     | 0.14  | 0.17 |
| DMR_20 | 28     | WT    | 0.73          | 0.24             | 0.28                     | 0.25  | 0.19 |
| DMR_20 | 30     | WT    | 0.26          | 0.20             | 0.21                     | 0.21  | 0.18 |
| DMR_20 | 31     | WT    | 0.58          | 0.27             | 0.32                     | 0.38  | 0.10 |
| DMR_20 | 36     | WT    | NA            | 0.38             | 0.46                     | 0.37  | 0.31 |
| DMR_20 | 14     | Mut   | 0.13          | 0.01             | 0.00                     | 0.01  | 0.03 |
| DMR_20 | 17     | Mut   | 0.33          | 0.01             | 0.01                     | 0.01  | 0.01 |
| DMR_20 | 24     | Mut   | 0.15          | 0.01             | 0.00                     | 0.02  | 0.00 |
| DMR_20 | 25     | Mut   | 0.30          | NA               | NA                       | NA    | NA   |
| DMR_20 | 26     | Mut   | 0.26          | 0.04             | 0.02                     | 0.04  | 0.07 |
| DMR_20 | 33     | Mut   | 0.23          | 0.06             | 0.10                     | 0.07  | 0.01 |

| DMR    | sample | SF3B1 | MeDIP<br>beta | EpiTYPER<br>mean | CpG position in amplicon |      |      |      |         |
|--------|--------|-------|---------------|------------------|--------------------------|------|------|------|---------|
|        |        |       |               |                  | 57                       | 244  | 257  | 275  | 371:375 |
| DMR_21 | 19     | WT    | 0.75          | 0.64             | 0.25                     | 0.84 | 0.89 | 0.65 | 0.55    |
| DMR_21 | 21     | WT    | 0.79          | 0.58             | 0.05                     | 0.84 | 0.73 | 0.76 | 0.52    |
| DMR_21 | 28     | WT    | 0.77          | 0.55             | 0.06                     | 0.53 | 0.79 | 0.63 | 0.74    |
| DMR_21 | 30     | WT    | 0.58          | 0.42             | 0.04                     | 0.52 | 0.64 | 0.58 | 0.31    |
| DMR_21 | 31     | WT    | 0.66          | 0.46             | 0.08                     | 0.62 | 0.71 | 0.35 | 0.54    |
| DMR_21 | 36     | WT    | 0.74          | NA               | NA                       | NA   | NA   | NA   | NA      |
| DMR_21 | 14     | Mut   | 0.62          | 0.36             | 0.03                     | 0.55 | 0.66 | 0.35 | 0.19    |
| DMR_21 | 17     | Mut   | 0.18          | 0.18             | 0.08                     | 0.28 | 0.35 | 0.15 | 0.05    |
| DMR_21 | 24     | Mut   | 0.14          | 0.22             | 0.04                     | 0.16 | 0.59 | 0.30 | 0.03    |
| DMR_21 | 25     | Mut   | 0.16          | NA               | NA                       | NA   | NA   | NA   | NA      |
| DMR_21 | 26     | Mut   | 0.14          | 0.19             | 0.02                     | 0.37 | 0.28 | 0.26 | 0.03    |
| DMR_21 | 33     | Mut   | 0.22          | 0.31             | 0.05                     | 0.44 | 0.61 | 0.29 | 0.14    |

| DMR    | sample | SF3B1 | MeDIP<br>beta | EpiTYPER<br>mean | CpG position in amplicon |         |      |         |         |
|--------|--------|-------|---------------|------------------|--------------------------|---------|------|---------|---------|
|        |        |       |               |                  | 54:49                    | 106:109 | 162  | 172:176 | 226:231 |
| DMR_22 | 19     | WT    | 0.04          | 0.04             | 0.03                     | 0.04    | 0.07 | 0.02    | 0.02    |
| DMR_22 | 21     | WT    | 0.05          | 0.02             | 0.03                     | 0.04    | 0.00 | 0.02    | 0.01    |
| DMR_22 | 28     | WT    | 0.95          | 0.64             | 0.76                     | 0.66    | 0.88 | 0.62    | 0.29    |
| DMR_22 | 30     | WT    | 0.24          | 0.12             | 0.38                     | 0.14    | 0.01 | 0.06    | 0.02    |
| DMR_22 | 31     | WT    | 0.68          | 0.27             | 0.58                     | 0.12    | 0.38 | 0.17    | 0.12    |
| DMR_22 | 36     | WT    | 0.06          | 0.22             | 0.23                     | 0.21    | 0.37 | 0.25    | 0.06    |
| DMR_22 | 14     | Mut   | 0.06          | 0.08             | 0.25                     | 0.05    | 0.04 | 0.03    | 0.03    |
| DMR_22 | 17     | Mut   | 0.04          | 0.02             | 0.02                     | 0.03    | 0.00 | 0.02    | 0.02    |
| DMR_22 | 24     | Mut   | 0.04          | 0.03             | 0.04                     | 0.05    | 0.01 | 0.02    | 0.01    |
| DMR_22 | 25     | Mut   | 0.03          | 0.03             | 0.04                     | 0.02    | 0.04 | 0.02    | 0.02    |
| DMR_22 | 26     | Mut   | 0.03          | 0.03             | 0.04                     | 0.02    | 0.03 | 0.02    | 0.02    |
| DMR_22 | 33     | Mut   | 0.03          | 0.03             | 0.03                     | 0.04    | 0.00 | 0.04    | 0.03    |

| DMR    | sample | SF3B1 | MeDIP<br>beta | EpiTYPER<br>mean | CpG position in amplicon |  |  |
|--------|--------|-------|---------------|------------------|--------------------------|--|--|
|        |        |       |               |                  | 404                      |  |  |
| DMR_24 | 19     | WT    | 0.82          | 0.88             | 0.88                     |  |  |
| DMR_24 | 21     | WT    | 0.76          | 0.78             | 0.78                     |  |  |
| DMR_24 | 28     | WT    | 0.77          | 0.78             | 0.78                     |  |  |
| DMR_24 | 30     | WT    | 0.73          | 0.73             | 0.73                     |  |  |
| DMR_24 | 31     | WT    | 0.44          | 0.38             | 0.38                     |  |  |
| DMR_24 | 36     | WT    | 0.75          | 0.52             | 0.52                     |  |  |
| DMR_24 | 14     | Mut   | 0.13          | 0.16             | 0.16                     |  |  |
| DMR_24 | 17     | Mut   | 0.33          | 0.11             | 0.11                     |  |  |
| DMR_24 | 24     | Mut   | 0.37          | 0.50             | 0.50                     |  |  |
| DMR_24 | 25     | Mut   | 0.16          | NA               | NA                       |  |  |
| DMR_24 | 26     | Mut   | 0.14          | 0.10             | 0.10                     |  |  |
| DMR_24 | 33     | Mut   | 0.34          | 0.07             | 0.07                     |  |  |

| DMR    | sample | SF3B1 | MeDIP<br>beta | EpiTYPER<br>mean | CpG position in amplicon |      |  |
|--------|--------|-------|---------------|------------------|--------------------------|------|--|
|        |        |       |               |                  | 75                       | 336  |  |
| DMR_25 | 19     | WT    | 0.83          | 0.39             | 0.78                     | 0.00 |  |
| DMR_25 | 21     | WT    | 0.83          | 0.45             | 0.82                     | 0.07 |  |
| DMR_25 | 28     | WT    | 0.78          | 0.15             | 0.29                     | 0.00 |  |
| DMR_25 | 30     | WT    | 0.67          | 0.10             | 0.15                     | 0.04 |  |
| DMR_25 | 31     | WT    | 0.74          | 0.47             | 0.93                     | 0.00 |  |
| DMR_25 | 36     | WT    | NA            | 0.31             | 0.48                     | 0.13 |  |
| DMR_25 | 14     | Mut   | 0.48          | 0.32             | 0.55                     | 0.09 |  |
| DMR_25 | 17     | Mut   | 0.34          | 0.05             | 0.10                     | 0.00 |  |
| DMR_25 | 24     | Mut   | 0.26          | 0.12             | 0.22                     | 0.02 |  |
| DMR_25 | 25     | Mut   | 0.17          | NA               | NA                       | NA   |  |
| DMR_25 | 26     | Mut   | 0.40          | NA               | NA                       | NA   |  |
| DMR_25 | 33     | Mut   | 0.56          | 0.17             | 0.19                     | 0.14 |  |

**Table S5. Validation of MeDIP-seq results by EpiTYPER MASSarray.** Given are the mean EpiTYPER methylation values and the mean beta-values calculated from MeDIP-seq by QSEA. The six samples analysed by EpiTYPER are a subset of the samples used for MeDIP-seq.

| DMR    | EpiTYPER means          |                          | MeDIP beta means         |                           |
|--------|-------------------------|--------------------------|--------------------------|---------------------------|
|        | SF3B1 WT<br>(6 samples) | SF3B1 mut<br>(6 samples) | SF3B1 WT<br>(14 samples) | SF3B1 mut<br>(13 samples) |
| DMR_1  | 0.21                    | 0.09                     | 0.48                     | 0.11                      |
| DMR_2  | 0.57                    | 0.27                     | 0.84                     | 0.46                      |
| DMR_3  | 0.76                    | 0.39                     | 0.79                     | 0.40                      |
| DMR_4  | 0.28                    | 0.11                     | 0.40                     | 0.10                      |
| DMR_5  | 0.20                    | 0.02                     | 0.44                     | 0.06                      |
| DMR_10 | 0.49                    | 0.32                     | 0.46                     | 0.13                      |
| DMR_11 | 0.07                    | 0.04                     | 0.28                     | 0.06                      |
| DMR_12 | 0.32                    | 0.06                     | 0.46                     | 0.11                      |
| DMR_13 | 0.50                    | 0.30                     | 0.51                     | 0.15                      |
| DMR_14 | 0.33                    | 0.04                     | 0.39                     | 0.07                      |
| DMR_15 | 0.35                    | 0.10                     | 0.88                     | 0.59                      |
| DMR_20 | 0.33                    | 0.03                     | 0.62                     | 0.22                      |
| DMR_21 | 0.53                    | 0.25                     | 0.71                     | 0.26                      |
| DMR_22 | 0.22                    | 0.03                     | 0.34                     | 0.04                      |
| DMR_24 | 0.68                    | 0.19                     | 0.71                     | 0.26                      |
| DMR_25 | 0.31                    | 0.16                     | 0.77                     | 0.41                      |

**Table S6. Motif enrichment analysis of the 67 hypomethylated regions in *SF3B1*<sup>mut</sup> patients.**

| Rank | Motif Name                                                 | Motif | P-value  | q-value (Benjamini) | # of Target Sequences with Motif (of 67) | % of Target Sequences with Motif | # of Background Sequences with Motif (of 42456) | % of Background Sequences with Motif |
|------|------------------------------------------------------------|-------|----------|---------------------|------------------------------------------|----------------------------------|-------------------------------------------------|--------------------------------------|
| 1    | ZNF165 (Zf)<br>WHIM12-ZNF165-ChIP-Seq<br>(GSE65937)        |       | 1.00E-03 | 0.398               | 9                                        | 13.43%                           | 1600.6                                          | 3.77%                                |
| 2    | BHLHA15 (bHLH)<br>NIH3T3-BHLHB8.HA-ChIP-Seq<br>(GSE119782) |       | 1.00E-02 | 0.5857              | 25                                       | 37.31%                           | 9228.3                                          | 21.73%                               |
| 3    | Foxf1 (Forkhead)<br>Lung-Foxf1-ChIP-Seq<br>(GSE77951)      |       | 1.00E-02 | 0.5857              | 8                                        | 11.94%                           | 1610.1                                          | 3.79%                                |
| 4    | Tcf12 (bHLH)<br>GM12878-Tcf12-ChIP-Seq<br>(GSE32465)       |       | 1.00E-02 | 0.5857              | 23                                       | 34.33%                           | 8411.3                                          | 19.81%                               |
| 5    | Olig2 (bHLH)<br>Neuron-Olig2-ChIP-Seq<br>(GSE30882)        |       | 1.00E-02 | 0.5857              | 25                                       | 37.31%                           | 9571.4                                          | 22.54%                               |
| 6    | Foxo3 (Forkhead)<br>U2OS-Foxo3-ChIP-Seq<br>(E-MTAB-2701)   |       | 1.00E-02 | 0.5857              | 7                                        | 10.45%                           | 1437.6                                          | 3.39%                                |
| 7    | Ascl1 (bHLH)<br>NeuralTubes-Ascl1-ChIP-Seq<br>(GSE55840)   |       | 1.00E-02 | 0.5857              | 31                                       | 46.27%                           | 13364.1                                         | 31.47%                               |
| 8    | AMyb (HTH)<br>Testes-AMyb-ChIP-Seq<br>(GSE44588)           |       | 1.00E-02 | 0.5857              | 17                                       | 25.37%                           | 5851.9                                          | 13.78%                               |
| 9    | FOXA1 (Forkhead)<br>LNCAP-FOXA1-ChIP-Seq<br>(GSE27824)     |       | 1.00E-02 | 0.5857              | 9                                        | 13.43%                           | 2242.5                                          | 5.28%                                |

## Bibliography

1. Dietrich, S.; Oleś, M.; Lu, J.; Sellner, L.; Anders, S.; Velten, B.; Wu, B.; Hülle, J.; da Silva Liberio, M.; Walther, T.; et al. Drug-perturbation-based stratification of blood cancer. *J. Clin. Invest.* **2018**, *128*, 427–445, doi:10.1172/JCI93801.
2. Lienhard, M.; Grasse, S.; Rolff, J.; Frese, S.; Schirmer, U.; Becker, M.; Börno, S.; Timmermann, B.; Chavez, L.; Sülthmann, H.; et al. QSEA-modelling of genome-wide DNA methylation from sequencing enrichment experiments. *Nucleic Acids Res.* **2017**, doi:10.1093/nar/gkw1193.
3. Oakes, C.C.; Seifert, M.; Assenov, Y.; Gu, L.; Przekopowicz, M.; Ruppert, A.S.; Wang, Q.; Imbusch, C.D.; Serva, A.; Koser, S.D.; et al. DNA methylation dynamics during B cell maturation underlie a continuum of disease phenotypes in chronic lymphocytic leukemia. *Nat. Genet.* **2016**, doi:10.1038/ng.3488.
4. Binet, J.L.; Auquier, A.; Dighiero, G.; Chastang, C.; Pigué, H.; Goasguen, J.; Vaugier, G.; Potron, G.; Colona, P.; Oberling, F.; et al. A new prognostic classification of chronic lymphocytic leukemia derived from a multivariate survival analysis. *Cancer* **1981**, *48*, 198–206, doi:10.1002/1097-0142(19810701)48:1<198::aid-cncr2820480131>3.0.co;2-v.
5. Vollbrecht, C.; Mairinger, F.D.; Koitzsch, U.; Peifer, M.; Koenig, K.; Heukamp, L.C.; Crispatsu, G.; Wilden, L.; Kreuzer, K.A.; Hallek, M.; et al. Comprehensive analysis of disease-related genes in chronic lymphocytic leukemia by multiplex PCR-based next generation sequencing. *PLoS One* **2015**, doi:10.1371/journal.pone.0129544.
